# Supplementary material
Source: publisher figshare collection journal article supplement (https://tandf.figshare.com/ndownloader/files/13000883)

## *Supplemental materials*

### **A Short Step Synthesis of Peramine, a Metabolite of Endophytic Fungi**

Shinsaku Ito, Yuta Yamamoto and Toshio Nishikawa\*

Graduate School of Bioagricultural Sciences, Nagoya University  
Furo-cho, Chikusa, Nagoya 464-8601, Japan

#### **Table of Contents:**

|                                                |      |
|------------------------------------------------|------|
| Synthesis of propargyl bromide <b>6</b>        | 2    |
| References                                     | 4    |
| <sup>1</sup> H and <sup>13</sup> C NMR Spectra | 5-14 |

#### **Synthesis of propargyl bromide **6****

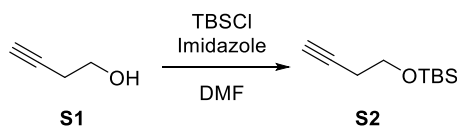

**((3-Butyn-1-yl)oxy)(*tert*-butyl)dimethylsilane (S2):** 3-Butyn-1-ol (**S1**) (21.0 g, 300 mmol) was dissolved in dry THF (100 mL) and the solution was stirred to 0 °C for 1 h. To this solution were added imidazole (40.8 g, 600 mmol) and TBSCl (45.2 g, 300 mmol). After stirring at rt for 1.5 h, the mixture was extracted with Et<sub>2</sub>O (x3), the combined organic layer was washed with H<sub>2</sub>O (x1) and brine, dried over anhydrous Na<sub>2</sub>SO<sub>4</sub>, and concentrated. The residue was distilled (10 mmHg, 55-60 °C) to give **S2** (44.8 g, 83%) as a colorless oil.

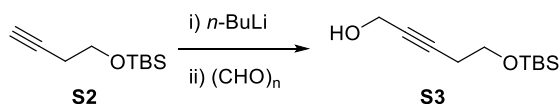

**5-((*tert*-Butyldimethylsilyl)oxy)pent-2-yn-1-ol (S3):** Alkyne **S2** (5.70 g, 31.0 mmol) was dissolved in dry THF (70 mL) and the solution was stirred to -78 °C for 20 min. To this solution was added *n*-BuLi (1.55 M in hexane, 20.0 mL, 31.0 mmol) dropwise over 5 min. After being warmed up to 0 °C, paraformaldehyde (4.65 g, 155 mmol) was added. Stirring was continued at rt for 4 h, and then the reaction was quenched by addition of water (20 mL). The mixture was extracted with Et<sub>2</sub>O (x3), and then the combined organic layer was washed brine, dried over anhydrous Na<sub>2</sub>SO<sub>4</sub>, and concentrated. The residue was purified by flash column chromatography (neutral silica gel, 200 g, hexane:Et<sub>2</sub>O = 2:1 (R<sub>f</sub> = 0.25)) to give compound **S3** (6.15 g, 92%) as a colorless oil.

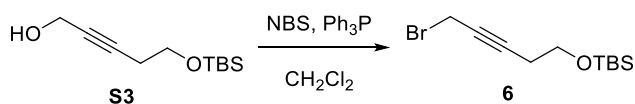

**((5-Bromopent-3-yn-1-yl)oxy)(*tert*-butyl)dimethylsilane (6):** To a solution of compound **S3** (1.86 g, 8.65 mmol) in CH<sub>2</sub>Cl<sub>2</sub> (50 mL) cooled at -23 °C were added recrystallized NBS (1.71 g, 9.52 mmol) and Ph<sub>3</sub>P (2.72 g, 10.4 mmol). After stirring at the same temperature for 1 h, the reaction was quenched with sat. NaHCO<sub>3</sub> solution (40 mL). The mixture was extracted with Et<sub>2</sub>O (x3), the combined organic layer was dried over anhydrous Na<sub>2</sub>SO<sub>4</sub> and concentrated. The residue was dissolved in Et<sub>2</sub>O, and the precipitate was filtered off and rinsed with Et<sub>2</sub>O. The filtrate was concentrated and

purified by flash column chromatography (neutral silica gel, 70 g, hexane ( $R_f = 0.16$ )) to give compound **6** (1.54 g, 63%) as a colorless oil.

## References

- 1.

2.

Current Data Parameters  
 NAME Itoh400A  
 EXPNO 33  
 PROCNO 2

F2 - Acquisition Parameters  
 Date 20171110  
 Time 18.28 h

INSTRUM spect  
 PROBHD 5 mm QNP 1H/13  
 PULPROG zg30  
 TD 65536  
 SOLVENT CDCl3  
 NS 8  
 DS 2  
 SWH 4901.961 Hz  
 FIDRES 0.149596 Hz  
 AQ 6.6846719 sec  
 RG 64  
 DW 102.000 usec  
 DE 6.50 usec  
 TE 297.2 K  
 D1 1.00000000 sec  
 TD0 1  
 SFO1 400.1321477 MHz  
 NUC1 1H  
 P1 15.00 usec

F2 - Processing parameters  
 SI 32768  
 SF 400.1300093 MHz  
 WDW EM  
 SSB 0  
 LB 0.30 Hz  
 GB 0  
 PC 1.00

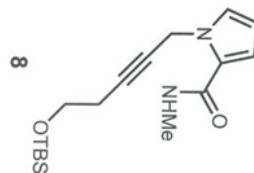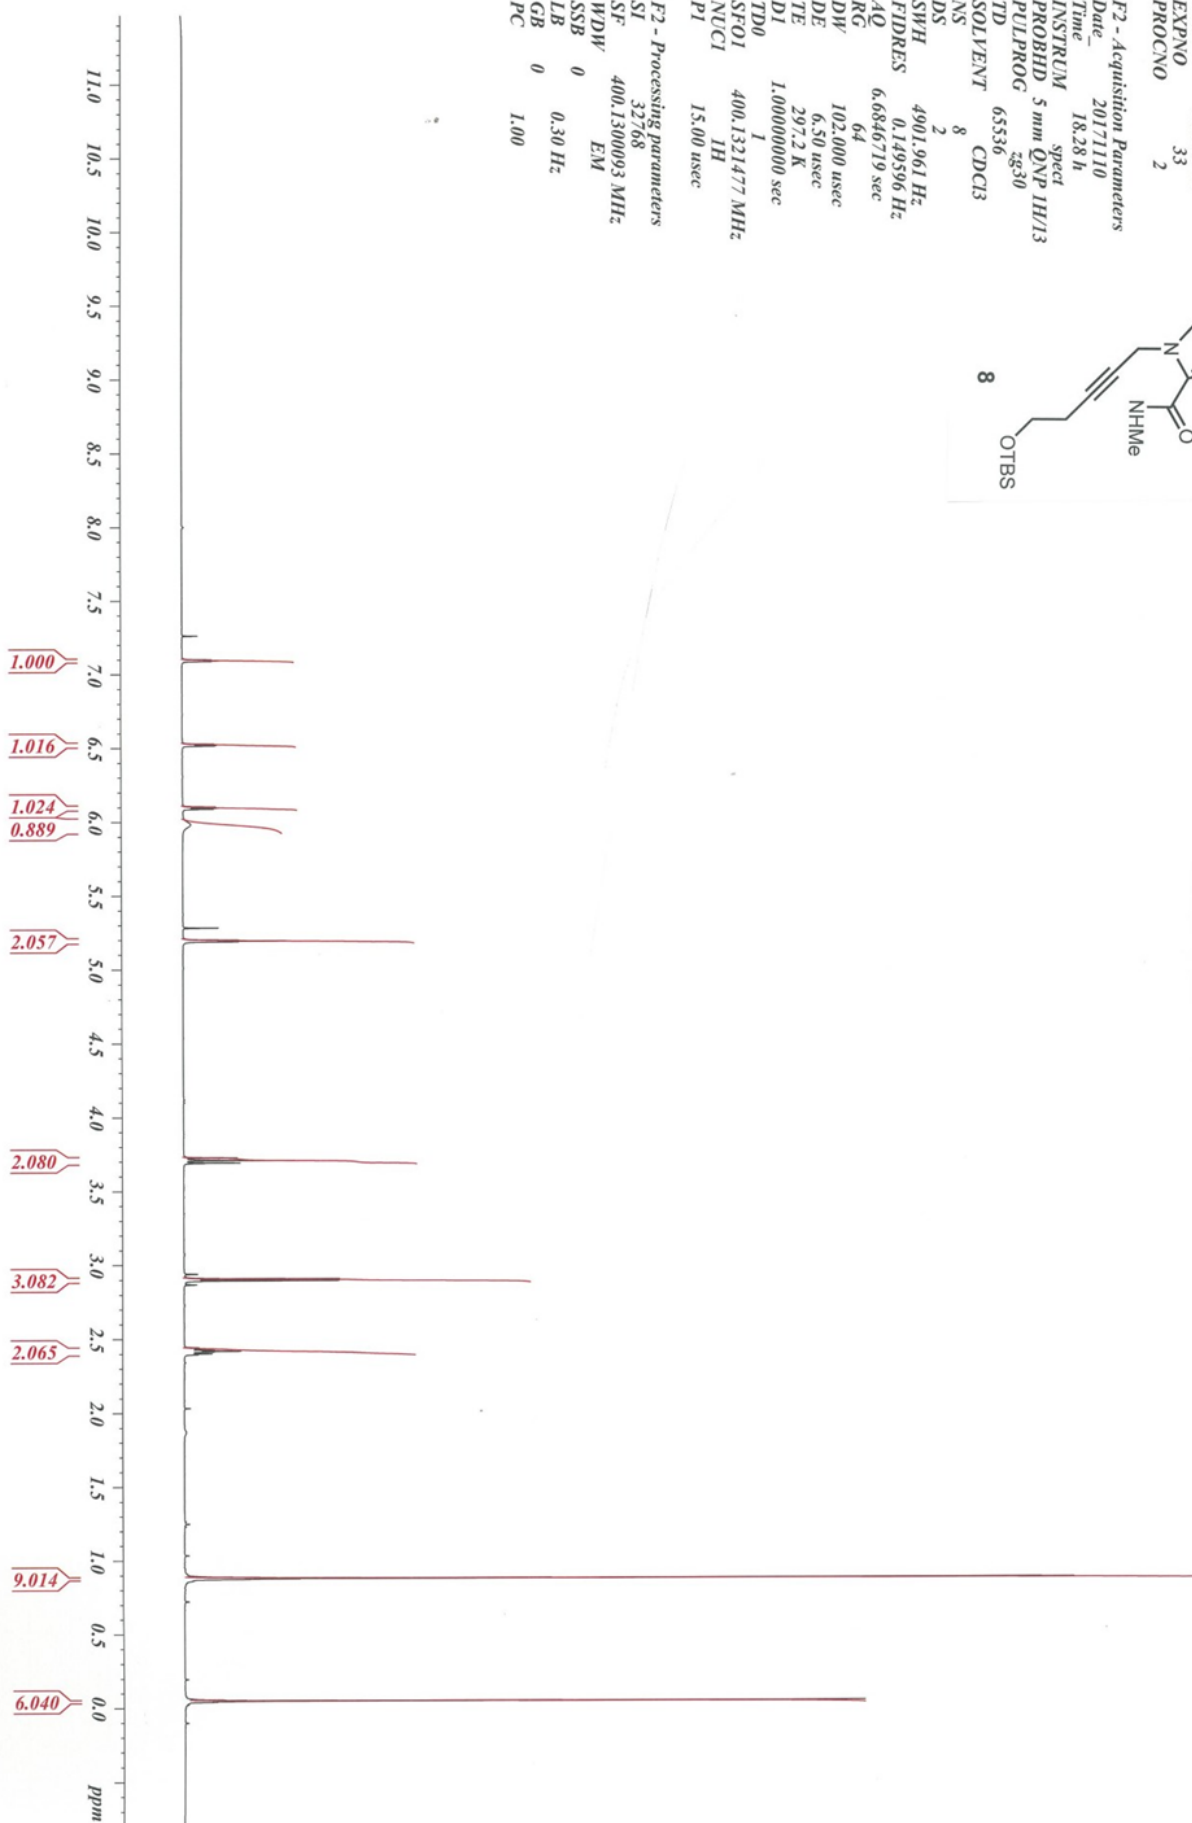

Current Data Parameters  
 NAME Itoh400B  
 EXPNO 40  
 PROCNO 1

F2 - Acquisition Parameters  
 Date\_ 20180502  
 Time 18.00

INSTRUM spect  
 PROBHD 5 mm QNP 1H/13  
 PULPROG zgpg30

TD 65536  
 SOLVENT CDCl3

NS 900  
 DS 4

SWH 23980.814 Hz  
 FIDRES 0.365918 Hz

AQ 1.3664256 sec  
 RG 2580.3

DW 20.850 usec  
 DE 6.50 usec

TE 297.2 K

D1 2.00000000 sec  
 D11 0.03000000 sec

TD0 1

===== CHANNEL f1 =====  
 NUC1 13C  
 P1 12.00 usec  
 PL1 7.50 dB

SFO1 100.6228298 MHz

===== CHANNEL f2 =====  
 CPDPRGf2 waltz16  
 NUC2 1H  
 PCPD2 80.00 usec

PL2 10.30 dB  
 PL12 25.00 dB  
 PL13 25.00 dB

SFO2 400.1316005 MHz

F2 - Processing Parameters  
 SI 32768  
 SF 100.6127629 MHz

WDW EM  
 SSB 0

LB 1.00 Hz  
 GB 0

PC 1.40

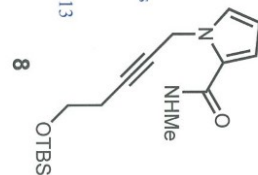

162.60

126.07  
125.06

111.99

107.54

83.07

77.47  
77.16  
76.84  
75.98

61.82

38.38

26.10  
25.94  
23.24

18.36

-5.24

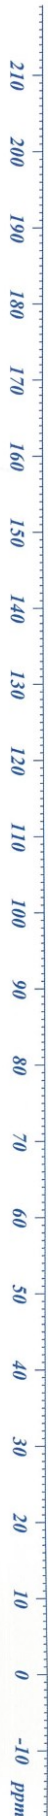

Current Data Parameters  
 NAME H0h400.4  
 EXPNO 20  
 PROCNO 2

F2 - Acquisition Parameters

Date 20171018  
 Time 14.22 h  
 INSTRUM spect  
 PROBHD 5 mm QNP 1H/13  
 PULPROG zg30  
 TD 65536  
 SOLVENT CDCl3  
 NS 8  
 DS 2  
 SWH 4901.961 Hz  
 FIDRES 0.149596 Hz  
 AQ 6.6846719 sec  
 RG 161.3  
 DW 102.000 usec  
 DE 6.50 usec  
 TE 297.2 K  
 D1 1.00000000 sec  
 TD0 1  
 SFO1 400.1321477 MHz  
 NUC1 1H  
 P1 15.00 usec

F2 - Processing parameters  
 SI 32768  
 SF 400.1300095 MHz  
 WDW EM  
 SSB 0  
 LB 0.30 Hz  
 GB 0  
 PC 1.00

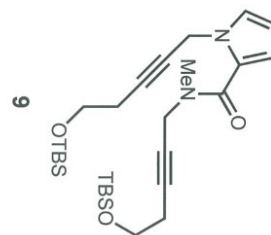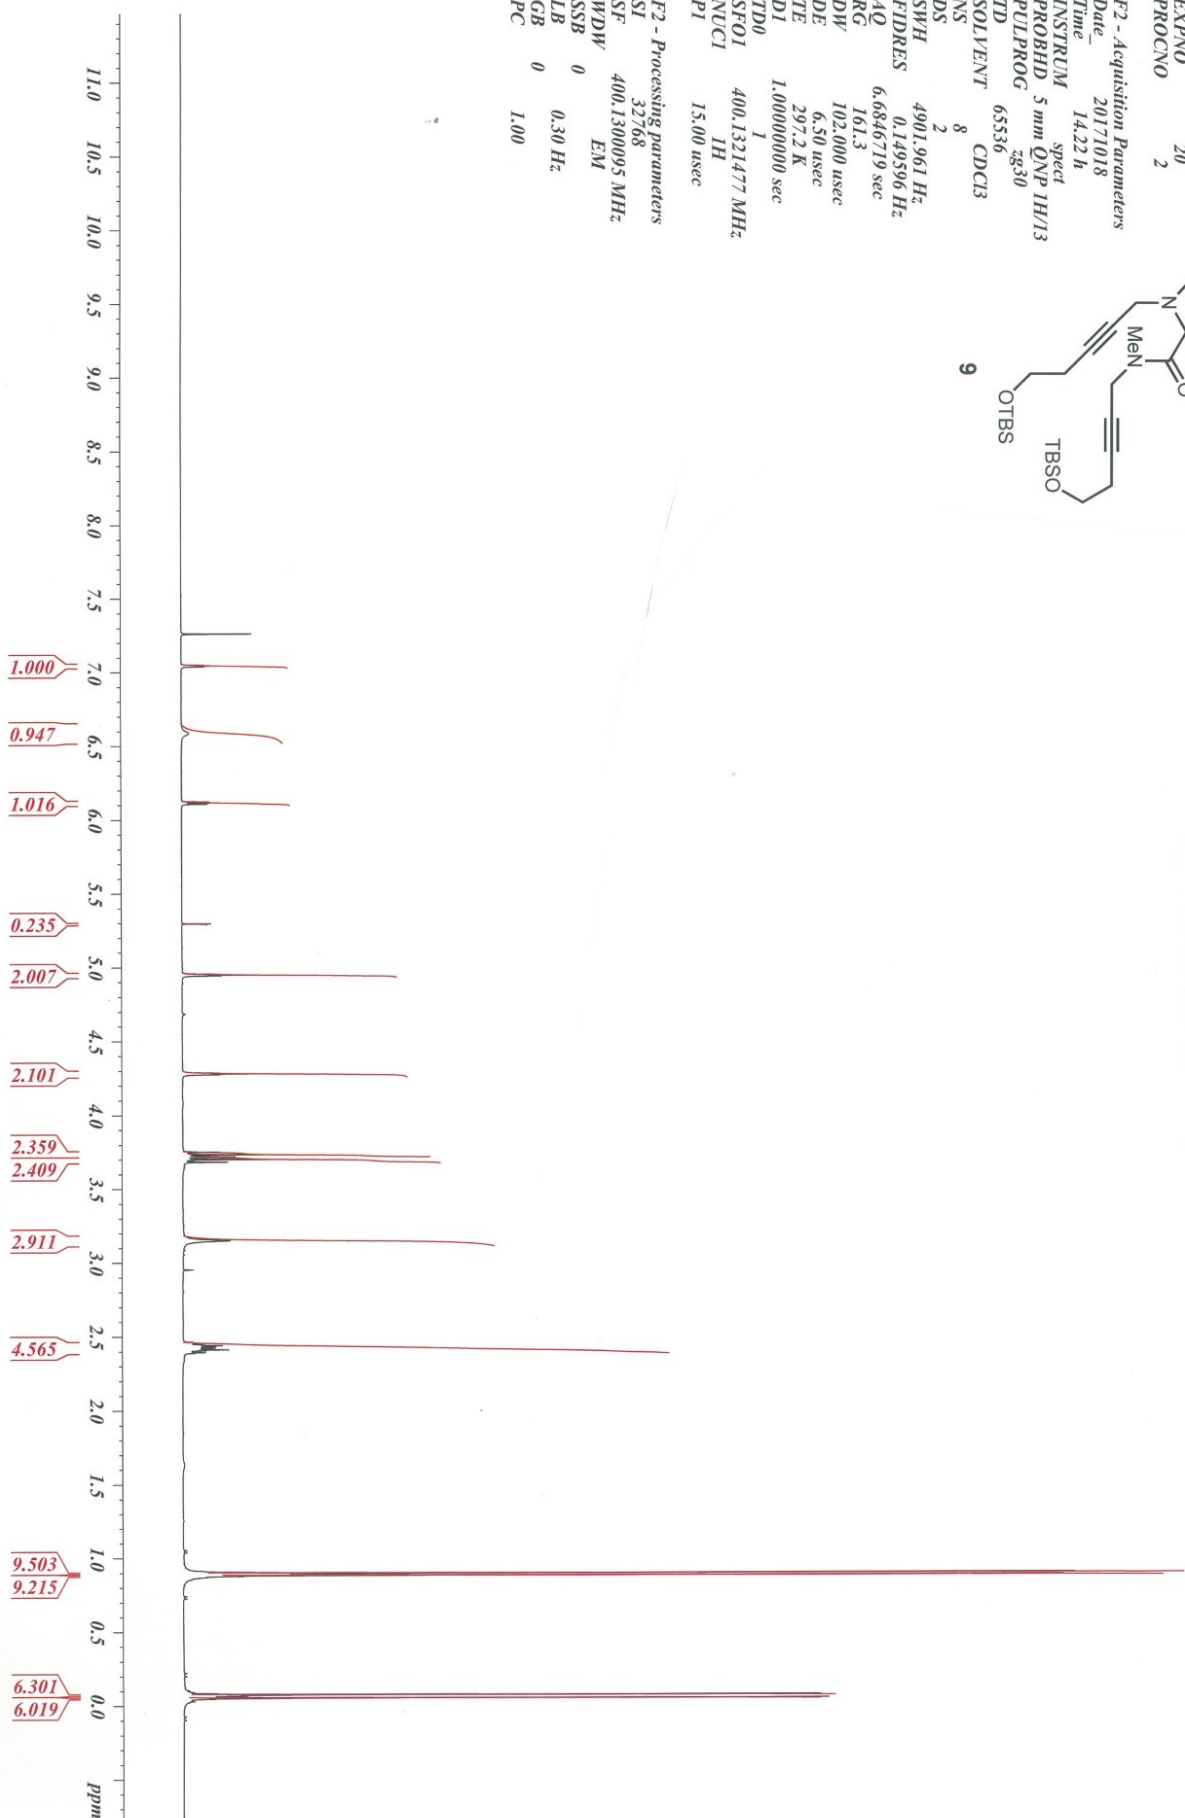

Current Data Parameters  
 NAME Ith400A  
 EXPNO 151  
 PROCNO 1

F2 - Acquisition Parameters  
 Date\_ 20180601  
 Time 19:05 h  
 INSTRUM spect  
 PROBHD 5 mm QNP 1H/13  
 PULPROG zgpg30  
 TD 65536  
 SOLVENT CDCl3  
 NS 900  
 DS 4  
 SWH 23980.814 Hz  
 FIDRES 0.731836 Hz  
 AQ 1.3664256 sec  
 RG 2580.3  
 DW 20.850 usec  
 DE 6.50 usec  
 TE 297.6 K  
 D1 1.00000000 sec  
 d11 0.03000000 sec  
 DELTA 0.89999998 sec  
 TD0 1  
 SFO1 100.6228298 MHz  
 NUC1 13C  
 P1 10.00 usec  
 SFO2 400.1316005 MHz  
 NUC2 1H  
 CPDPRG2 waltz16  
 PCPD2 80.00 usec

F2 - Processing parameters  
 SI 32768  
 SF 100.6127564 MHz  
 WDW EM  
 SSB 0  
 LB 1.00 Hz  
 GB 0  
 PC 1.40

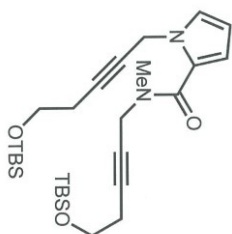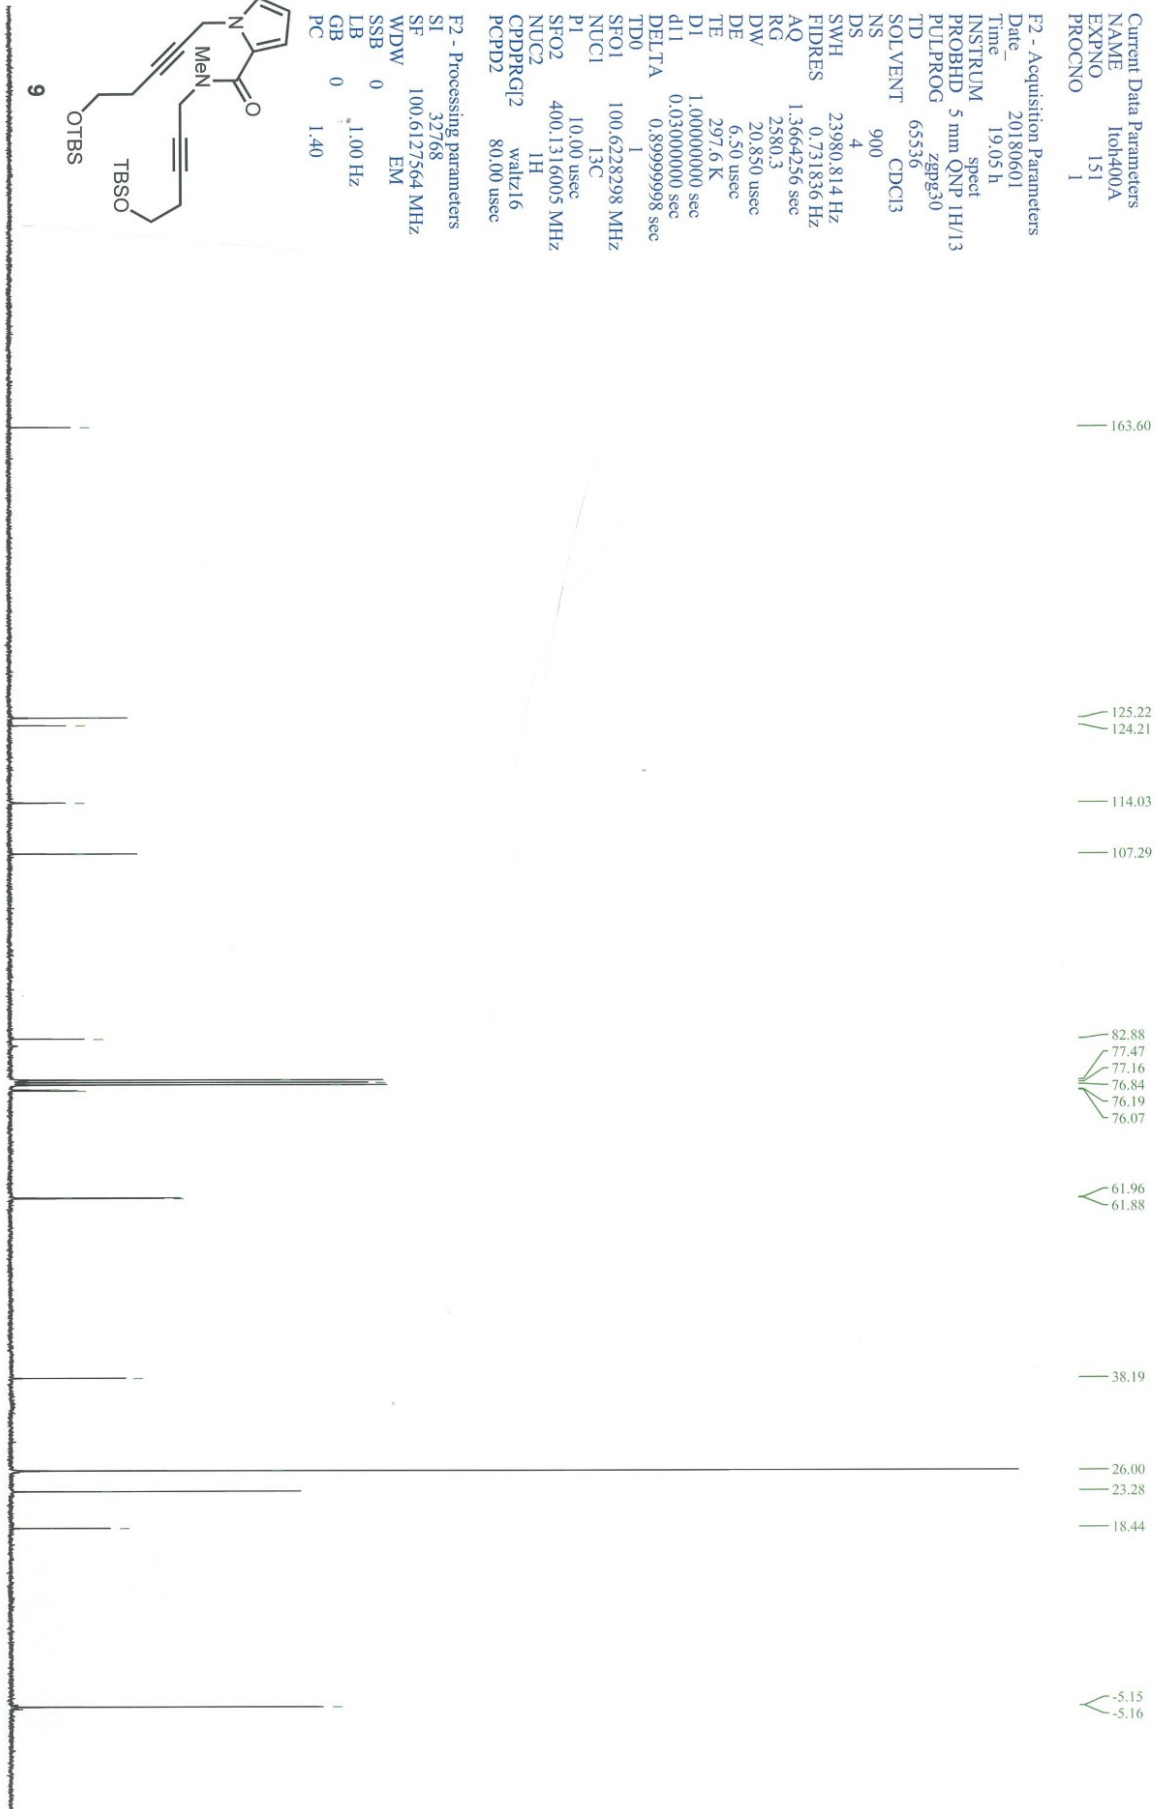



Current Data Parameters  
 NAME Itoh400B  
 EXPNO 50  
 PROCNO 1

F2 - Acquisition Parameters

Date\_ 20180521  
 Time 12.38  
 INSTRUM spect  
 PROBHD 5 mm QNP 1H/13  
 PULPROG zg30  
 TD 65536  
 SOLVENT D2O  
 NS 8  
 DS 2  
 SWH 8278.146 Hz  
 FIDRES 0.126314 Hz  
 AQ 3.9583745 sec  
 RG 256  
 DW 60.400 usec  
 DE 6.50 usec  
 TE 297.2 K  
 D1 1.00000000 sec  
 TD0 1

CHANNEL f1

NUC1 1H  
 P1 15.00 usec  
 PL1 10.30 dB  
 SFO1 400.1324710 MHz

F2 - Processing parameters

SI 32768  
 SF 400.129578 MHz  
 WDW EM  
 SSB 0  
 LB 0.30 Hz  
 GB 0  
 PC 1.00

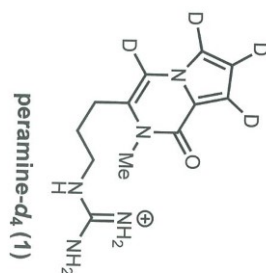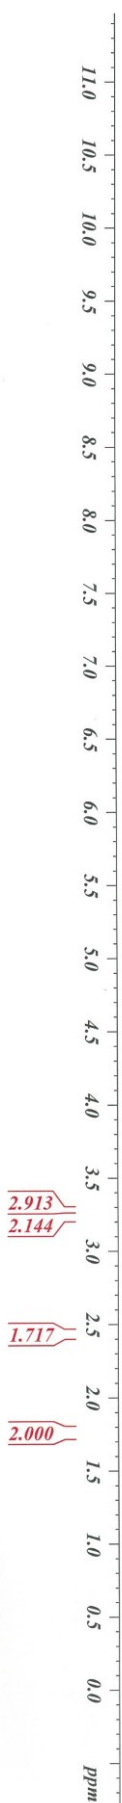

Current Data Parameters  
NAME Itob600  
EXPNO 2  
PROCNO 2

# F2 - Acquisition Parameters

Date\_ 20180522  
Time 16.42  
INSTRUM spect  
PROBHD 5 mm CPTCI 1H-  
PULPROG zgpg30  
TD 65536  
SOLVENT MeOD  
NS 10000  
DS 4  
SWH 36057.691 Hz  
FIDRES 0.550197 Hz  
AQ 0.9087659 sec  
RG 191.81  
DW 13.867 usec  
DE 26.00 usec  
TE 295.0 K  
D1 1.20000005 sec  
D11 0.03000000 sec  
TD0 1

===== CHANNEL f1 =====  
SFO1 150.9178981 MHz  
NUC1 13C  
P1 15.00 usec  
PLW1 60.00000000 W

===== CHANNEL f2 =====  
SFO2 600.1324005 MHz  
NUC2 1H  
CPDPRG2 waltz65  
PCPD2 80.00 usec  
PLW2 4.30000019 W  
PLW12 0.06718800 W  
PLW13 0.04300000 W

F2 - Processing Parameters  
SI 32768  
SF 150.9026203 MHz  
WDW EM  
SSB 0  
LB 1.00 Hz  
GB 0  
PC 1.40

158.51  
128.45  
123.35  
119.44  
119.24  
119.05  
113.05  
112.87  
112.70  
110.15  
109.98  
109.81  
108.08  
107.89  
107.70

49.12  
49.00  
48.87  
41.33  
29.39  
28.31  
28.04

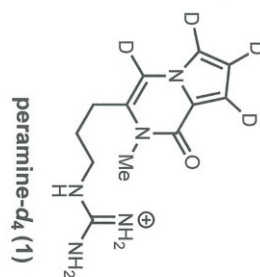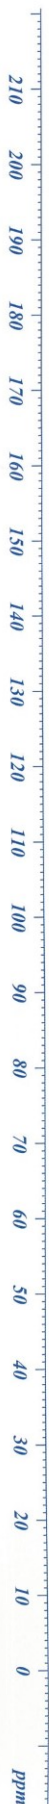

Current Data Parameters  
 NAME Itoh400B  
 EXPNO 51  
 PROCNO 2

F2 - Acquisition Parameters

Date\_ 20180521  
 Time 17.29  
 INSTRUM spect  
 PROBD 5 mm QNP 1H/13  
 PULPROG zg30  
 TD 65536  
 SOLVENT CDCl3  
 NS 16  
 DS 2  
 SWH 8278.146 Hz  
 FIDRES 0.126314 Hz  
 AQ 3.9583745 sec  
 RG 456.1  
 DW 60.400 usec  
 DE 6.50 usec  
 TE 297.2 K  
 D1 1.00000000 sec  
 TDO 1

===== CHANNEL f1 =====

NUC1 1H  
 P1 15.00 usec  
 PL1 10.30 dB  
 SF01 400.1324710 MHz

F2 - Processing parameters

SI 32768  
 SF 400.1300093 MHz  
 WDW EM  
 SSB 0  
 LB 0.30 Hz  
 GB 0  
 PC 1.00

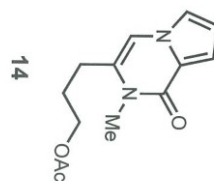

1.000  
 1.024  
 1.056  
 1.022

2.241

3.275

2.248

3.272  
 2.381

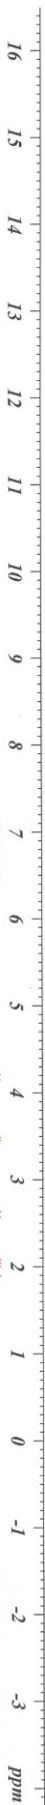

Current Data Parameters  
 NAME Ith400A  
 EXPNO 134  
 PROCNO 3

# F2 - Acquisition Parameters

Date\_ 20180507  
 Time 16.01 h  
 INSTRUM spect  
 PROBD 5 mm QNP 1H/13  
 PULPROG zgpg30  
 TD 65536  
 SOLVENT MeOD  
 NS 512  
 DS 4  
 SWH 23980.814 Hz  
 FIDRES 0.731836 Hz  
 AQ 1.3664256 sec  
 RG 574.7  
 DW 20.850 usec  
 DE 6.50 usec  
 TE 297.4 K  
 D1 1.00000000 sec  
 d11 0.03000000 sec  
 DELTA 0.89999998 sec  
 TD0 1  
 SFO1 100.6228298 MHz  
 NUC1 13C  
 P1 10.00 usec  
 SFO2 400.1316005 MHz  
 NUC2 1H  
 CPDPRG2 waltz16  
 PCPD2 80.00 usec

F2 - Processing Parameters  
 SI 32768  
 SF 100.6126275 MHz  
 WDW EM  
 SSB 0  
 LB 1.00 Hz  
 GB 0  
 PC -0.06

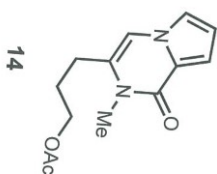

172.89  
 159.29  
 129.25  
 123.71  
 119.85  
 113.47  
 110.45  
 108.43  
 64.62  
 49.64  
 49.42  
 49.21  
 49.00  
 48.79  
 48.57  
 48.36  
 29.71  
 28.53  
 20.81

210 200 190 180 170 160 150 140 130 120 110 100 90 80 70 60 50 40 30 20 10 0 ppm

Current Data Parameters  
 NAME Itoh400A  
 EXPNO 41  
 PROCNO 2

F2 - Acquisition Parameters

Date\_ 20171127  
 Time 10.47 h  
 INSTRUM spect  
 PROBHD 5 mm QNP 1H/13  
 PULPROG zg30  
 TD 65536  
 SOLVENT MeOD  
 NS 8  
 DS 2  
 SWH 4901.961 Hz  
 FIDRES 0.149596 Hz  
 AQ 6.6846719 sec  
 RG 256  
 DW 102.000 usec  
 DE 6.50 usec  
 TE 299.3 K  
 D1 1.00000000 sec  
 TD0 1  
 SFO1 400.1321477 MHz  
 NUC1 1H  
 P1 15.00 usec

F2 - Processing parameters

SI 32768  
 SF 400.130088 MHz  
 WDW EM  
 SSB 0  
 LB 0.30 Hz  
 GB 0  
 PC 1.00

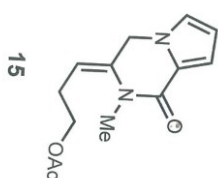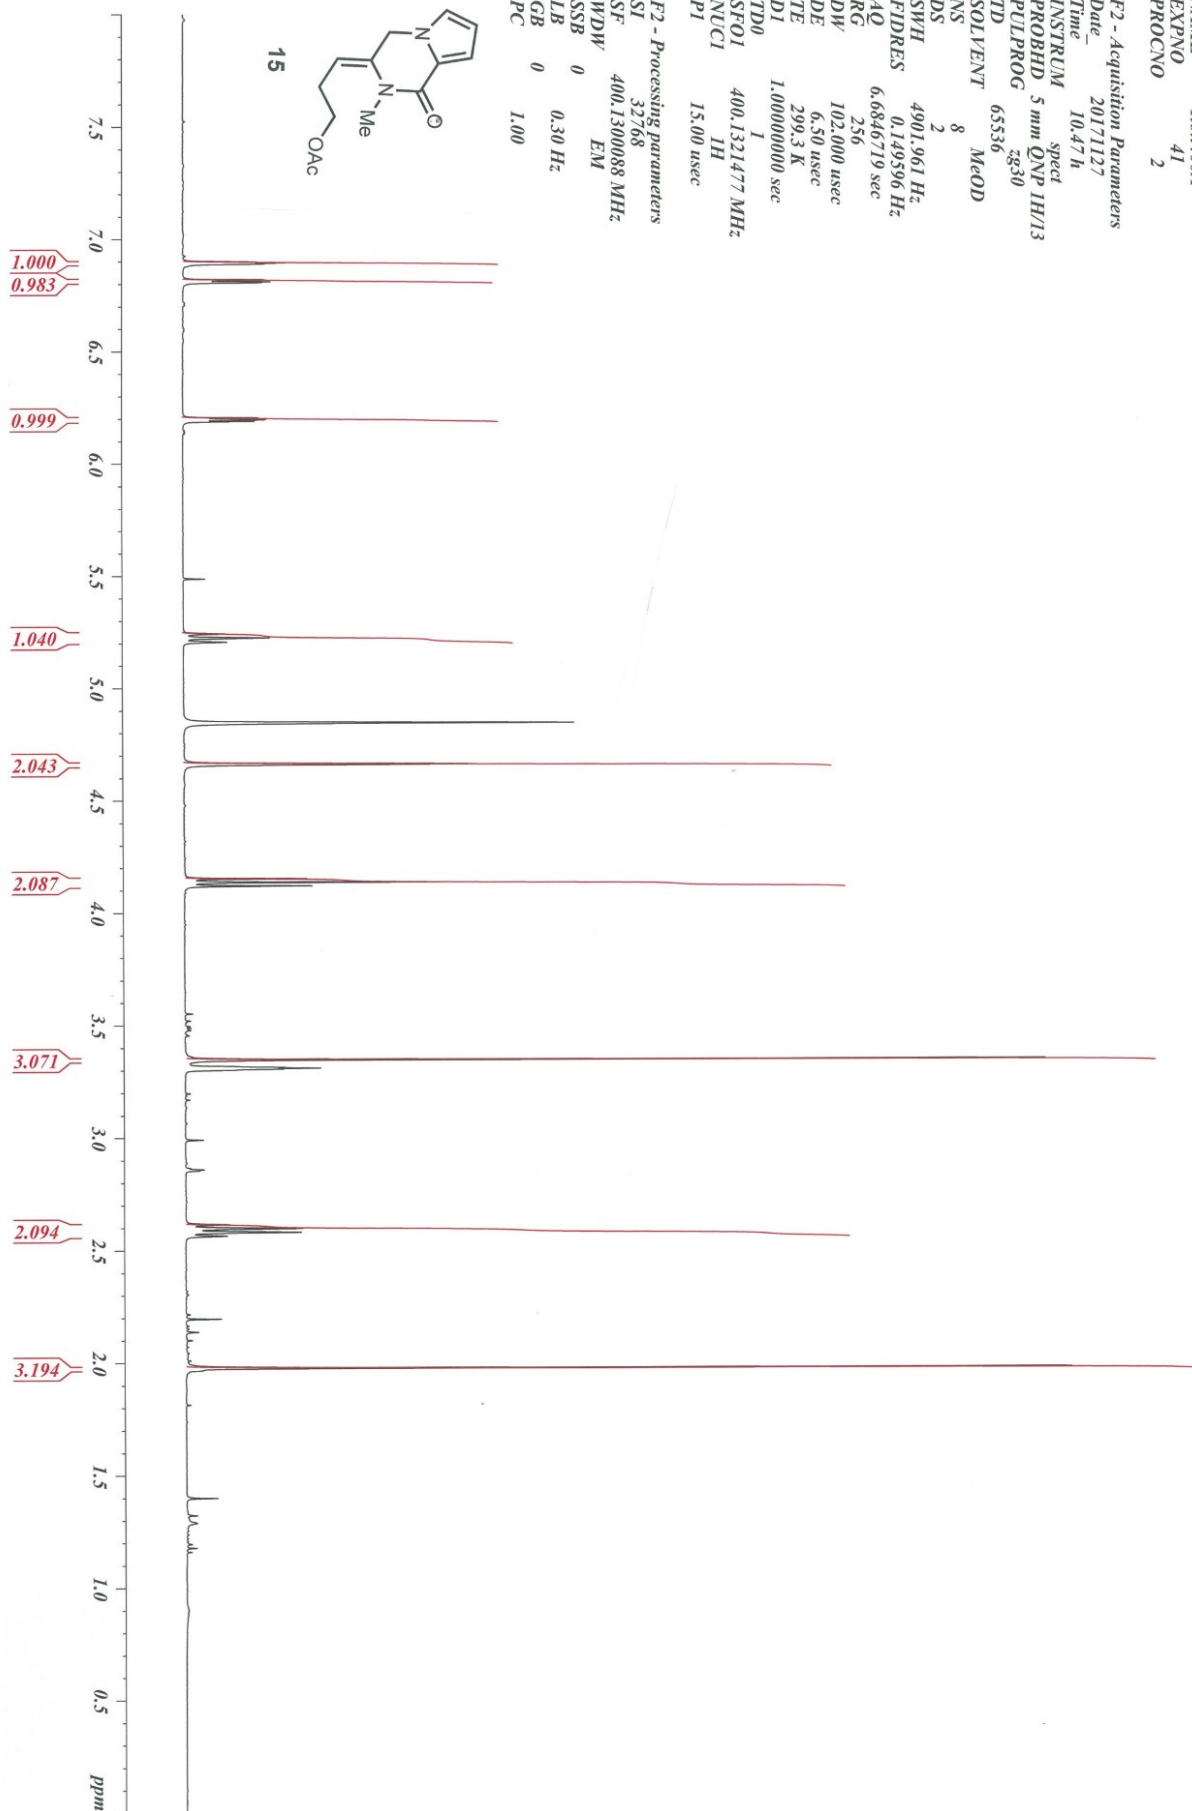

Current Data Parameters  
NAME lth400A  
EXPNO 43  
PROCNO 1

F2 - Acquisition Parameters

Date\_ 20171127  
Time 11.54 h  
INSTRUM spect  
PROBHD 5 mm QNP 1H/13  
PULPROG zgpg30  
TD 65536  
SOLVENT MeOD  
NS 1096  
DS 4  
SWH 23980.814 Hz  
FIDRES 0.731836 Hz  
AQ 1.3664256 sec  
RG 574.7  
DW 20.850 usec  
DE 6.50 usec  
TE 300.6 K  
D1 1.00000000 sec  
d11 0.03000000 sec  
DELTA 0.89999998 sec  
TD0 1  
SFO1 100.628298 MHz  
NUC1 13C  
P1 10.00 usec  
SFO2 400.1316005 MHz  
NUC2 1H  
CPDPRG2 waltz16  
PCPD2 80.00 usec

F2 - Processing parameters

SI 32768  
SF 100.6126285 MHz  
WDW EM  
SSB 0  
LB 0  
GB 0  
PC 1.40

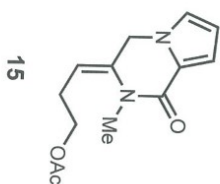

172.77  
161.25  
136.68  
124.88  
124.50  
116.42  
114.38  
110.79  
64.44  
51.11  
49.64  
49.42  
49.21  
49.00  
48.78  
48.57  
48.36  
35.66  
28.27  
20.66

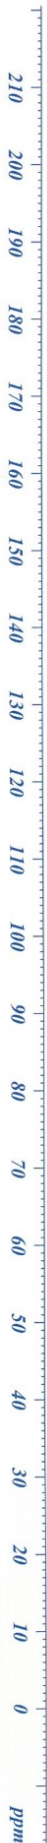

Supplement: Supplementary file 1 [file 13000883]
